# Supplementary material for: Targeting Hsp20 Using the Novel Small Non-coding RNA DnrH Regulates Heat Tolerance in Deinococcus radiodurans
Source: PubMed Central journal article supplement (PMC6798082; doi:10.3389/fmicb.2019.02354), 2019-10-11
Supplement: Data_Sheet_1.pdf [file Data_Sheet_1.pdf]

## Supplementary Material

### 1 Supplementary Figures and Tables

#### 1.1 Supplementary Figures

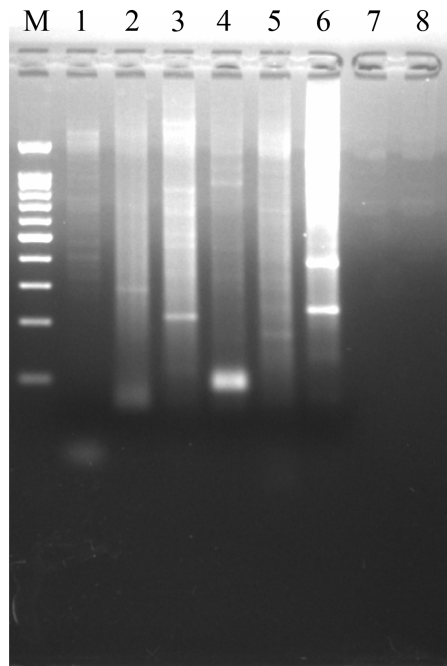

**Supplementary Figure S1.** The original gels of 5'-RACE results. PCR results of 5'-RACE. Lane M: 100bp DNA Ladder (Transgen Biotech); Lane 3: 5'-RACE of *DnrH*; Remaining lanes are 5'-RACE results of other ncRNAs those have been done at the same time.

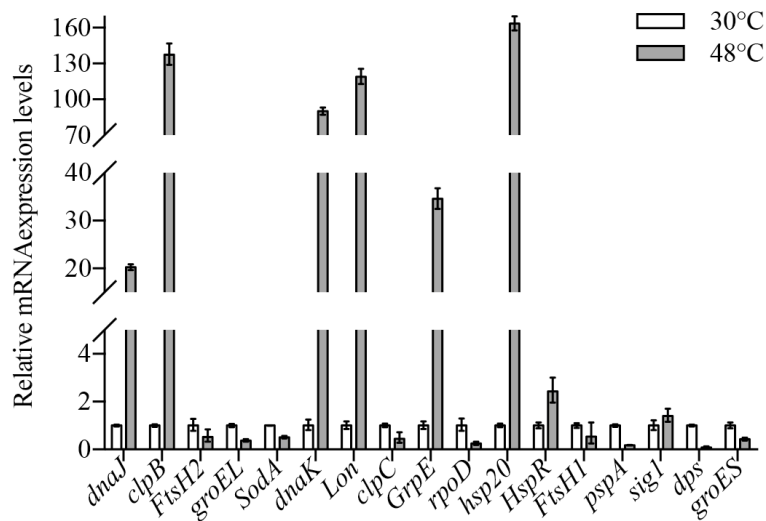

**Supplementary Figure S2.** Expression of heat regulatory genes in wildtype *D. radiodurans* under heat stress.

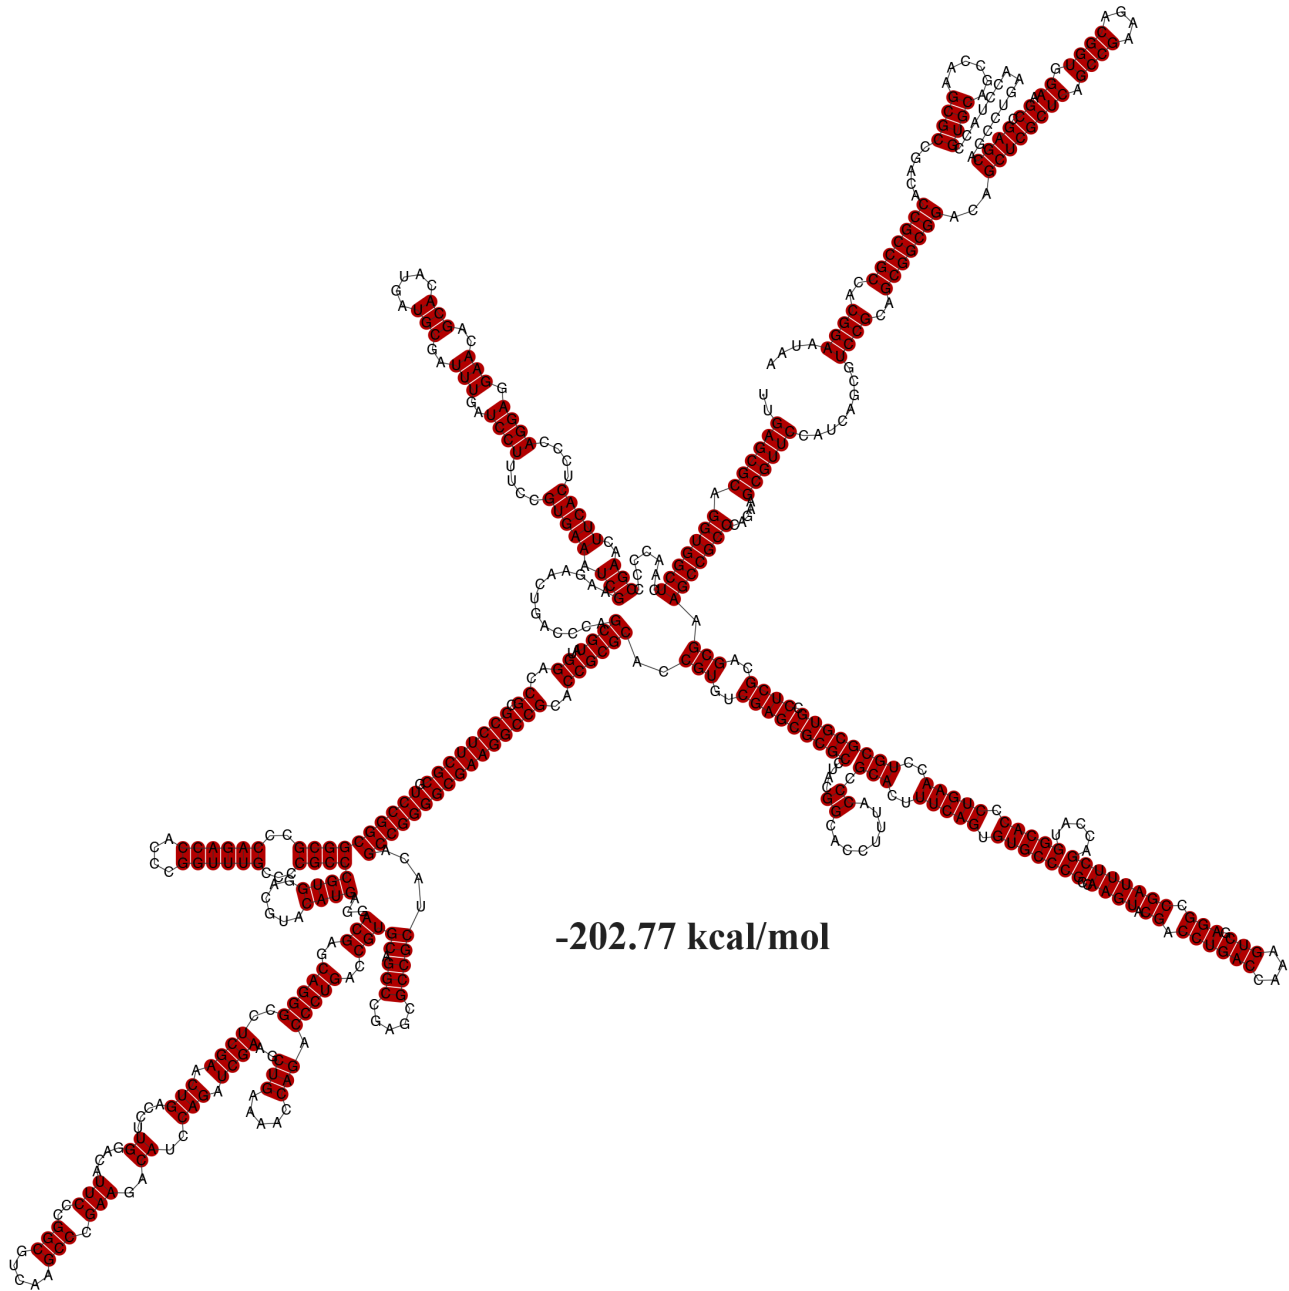

**Supplementary Figure S3.** Secondary structure of *Hsp20* prediction performed with RNAalifold.

## 1.2 Supplementary Tables

Supplementary table S1 Primers used in this study

| Primers        | Sequence (5' – 3')                                                      | Purpose       |
|----------------|-------------------------------------------------------------------------|---------------|
| GSP1           | GCCCATAAACGCATCC                                                        | 5' RACE       |
| GSP2           | TCCGGATTTTTGCCCACTGGCACAGA                                              |               |
| GSP3           | TTTGCCCACTGGCACAGAGAAAACG                                               |               |
| 16S            | F: ATTCCTGGTGTAGCGGTG<br>R: CATCGTTTAGGGTGTGGAC                         | qRT-PCR       |
| DnrH           | F: GCGAGTTGCTTCTGTGCTGTC<br>R: GCCTTGACAAAGACTGAATACC                   |               |
| dnaJ(DR0126)   | F: AGGACTACTACGACGTGCTCG<br>R: TGGCCGTA CTGGTCGTACAG                    |               |
| clpB(DR1046)   | F: GAACCCTGCTCGACAACGAC<br>R: GCGAGCGTGTCCGCCTTCTG                      |               |
| FtsH-1(DR0583) | F: AGTTGCTCGTCGAGATGGACG<br>R: AGGTCCACCGACACGTCGAGTG                   |               |
| groEL(DR0607)  | F: GAGCTGGAGGACAAGCTG<br>R: GCCACGGCCTTGTCGATGC                         |               |
| SodA(DR1279)   | F: GCTGGGCGTGGCTGGTCGTC<br>R: GCTTCGAGACTTCGTCCCAGTTC                   |               |
| dnaK(DR0129)   | F: GTCAGGCTGCGCTCAAC<br>R: CGTCGCTCACCAGCTTGCGC                         |               |
| Lon(DR1974)    | F: ACGCACCACGCCACCTGGAC<br>R: TCTGCTCGCGCAGGTAGTACTC                    |               |
| clpC(DR1117)   | F: ACCAAGTACCGCGGTGAATTTCG<br>R: TGAGGATGTTGGCTGCGTCG                   |               |
| ropD(DR0916)   | F: TCTCTATCGCCAAGAAGTAC<br>R: TGACGAATCCACCACGTC                        |               |
| hsp20(DR1114)  | F: GGCCTCGAACTGACCTTGGACATTC<br>R: AAAGGTGCCGTAGGCGCGCTCGACA            |               |
| HspR(DR0934)   | F: TGTCTACGTCATCTCGGTG<br>R: TGCAGGTCGTCGAGCTGGTG                       |               |
| FtsH-2(DR1020) | F: ATTAAGCTCACCTTCGCGGAC<br>R: ACGAAGTCGGAGCCGGAGATG                    |               |
| pspA(DR1473)   | F: ACCACAAGGACCTCGCCAAG<br>R: TGAAGCCTGACACGCGGTTCG                     |               |
| sigI(DR0180)   | F: GTGCAGGCCGCGGAGAGCGAG<br>R: TGCACGTCCGACACGTCGGCCAG                  |               |
| dps(DR2263)    | F: CAAGAGCGAGGCAGCCAGCAAG<br>R: TGATGGTGGTCGCCAGGTTGCGTTG               |               |
| groES(DR0606)  | F: GCGACCGCGTTCTGGTTG<br>R: GTA CTGGCGAAGTACACG                         |               |
| 5S-dig         | F: ACACCCCCGTGCCATAGCACTGTGGAAC<br>R: AAACCCCCGCGCTGACCGACTTTTCCG       | Northern blot |
| hsp20-dig      | F: GGCCTCGAACTGACCTTGGACATTCCCGG<br>R: CACCGTGTGAGCGCGCCTACGGCACCTTT    |               |
| DnrH-dig       | F: CGCATCCGGATTTTTGCCCACTGGCACAGA<br>R: CGTTTTGGGTTTCGCTCGGATTCCGGCGGAC |               |

|                |                                                                                                                                              |                                            |
|----------------|----------------------------------------------------------------------------------------------------------------------------------------------|--------------------------------------------|
| Hsp20-U        | F: AGCGTTCAACCTGCGCCTTCTGCGTG<br>R:<br>CAAGGGCCCTCGGTCTCCATGGTAGTCCTATAT<br>TAAACTTGAGTGC                                                    | hsp20 mutant<br>construction               |
| Hsp20-M        | F:<br>CAAGTTTTAATATAGGACTACCATGGAGACCGA<br>GGGCCCTTGACATTG<br>R:<br>GGTAAAGATGGGTTTACGGGTTATTTGCCGACT<br>ACCTTGGTGATCTCG                     |                                            |
| Hsp20-D        | F:<br>CACCAAGGTAGTCGGCAAATAACCCGTAAACCC<br>ATCTTTACCTTTTC<br>R: AGGTCGATGGCGCCGTCGGCGTTCAC                                                   |                                            |
| Hsp20-C        | F:<br>ACACTGGCGGCCGTTACTAGTCTGCTCGGGTTCG<br>CGCGGCTGG<br>R:<br>TGCCTGCAGGTCGAATCGGATCCTTATTCCGTG<br>GCGGCGGTGTC                              | hsp20<br>complementary<br>strain construct |
| DnrH-mut-com-1 | F:<br>CCGAATTCCAGCACACTGGCGGCCGTTACTAGT<br>TACATCGACTACGAAGCC<br>R:<br>AATGGGTAAAGCAATATCGGCGGGAAGCGCGA<br>CGGTGATAGAAAAAGAATACCG            | DnrH site-<br>directed<br>mutagenesis      |
| DnrH-mut-com-2 | F:<br>GCGCTTCCCGCCGATATTGCTTTACCCATTCGCT<br>CGGATTCGGCGGACAGCACAG<br>R:<br>GCTTGCATGCCTGCAGGTCGAATCGGATCCCCC<br>GCGCTCGACCTGAGCGGCAGC        |                                            |
| Z3             | F: CTCGCGAGGCCTCGAGATCT<br>R: TTGGGTTCTCAGTTTGCTGA                                                                                           | Complementary<br>strain checking           |
| DnrH-U         | F: CCACTGAGCCTCAGCGAGGCCGACGCTTTC<br>R:<br>GCAGTTTCATTTGATGCTCGATGAGTTTTTCTAA<br>GCCCCCTTGCGGACGGTGAT                                        | DnrH mutant<br>construction                |
| DnrH-M         | F:<br>CACTATTCTTTCCTTATCACCGTCCGCAAGGGGG<br>GCTTAGAAAACTCATCGAGCATC<br>R:<br>GATAAAGAAAGAATAGTGCGGTATACGCGCGTT<br>GTCAACATGGAGACCGAGGGCCCTTG |                                            |
| DnrH-D         | F:<br>GAATCATTCTCAATGTCAAGGGCCCTCGGTCTC<br>CATGTTGACAACGCGCGTATACCGC<br>R:<br>GCTGCTGCGTCAGCTCGCCGAGTGGCAC                                   |                                            |

|        |                                                              |                                           |
|--------|--------------------------------------------------------------|-------------------------------------------|
| DnrH-C | F:<br>CCGAATCCAGCACACTGGCGGCCGTTACTAGT<br>TACATCGACTACGAAGCC | DnrH<br>complementary<br>strain construct |
|        | R:<br>GCATGCCTGCAGGTCGAATCGGATCCCCGCGC<br>TCGACCTGAGCGG      |                                           |

**Supplementary table S2** Synthesized ssRNA oligonucleotide derivatives for MST

| Name                    | Sequence (5' – 3')             | Relevant characteristics                               |
|-------------------------|--------------------------------|--------------------------------------------------------|
| <i>DnrH-wt</i> (5'FAM)  | CGCGAAGGGCGGCUUUUUCGUUUUGGGUUU | WT, interaction with <i>Hsp20-wt</i>                   |
| <i>DnrH-mut</i> (5'FAM) | GCGCUUCCCGCCGAUAUUGCUUUACCCAUU | Dismatch mutation, no interaction with <i>Hsp20-wt</i> |
| <i>Hsp20-wt</i>         | CUGACCCAGCGUAUGGACCGCGCCUUCGCG | WT, interaction with <i>DnrH-wt</i>                    |
